# Supplementary material
Source: ML conference proceedings conference paper supplement (https://openaccess.thecvf.com/content/ICCV2021/html/Kim_Deep_Edge-Aware_Interactive_ICCV_2021_paper.html)
Supplement: Supplementary file 2 [file Kim_Deep_Edge-Aware_Interactive_ICCV_2021_supplemental.zip]

Archive with 2 entries (2 files):
- 06958-supp/06958-supp.pdf
- 06958-supp/DemoVideo.mp4
